# Supplementary material for: Optimising GPs’ communication of advice to facilitate patients’ self-care and prompt follow-up when the diagnosis is uncertain: a realist review of ‘safety-netting’ in primary care
Source: PubMed Central journal article supplement (PMC9234415; doi:10.1136/bmjqs-2021-014529), 2022-03-30

## Appendix 3 Initial programme theory

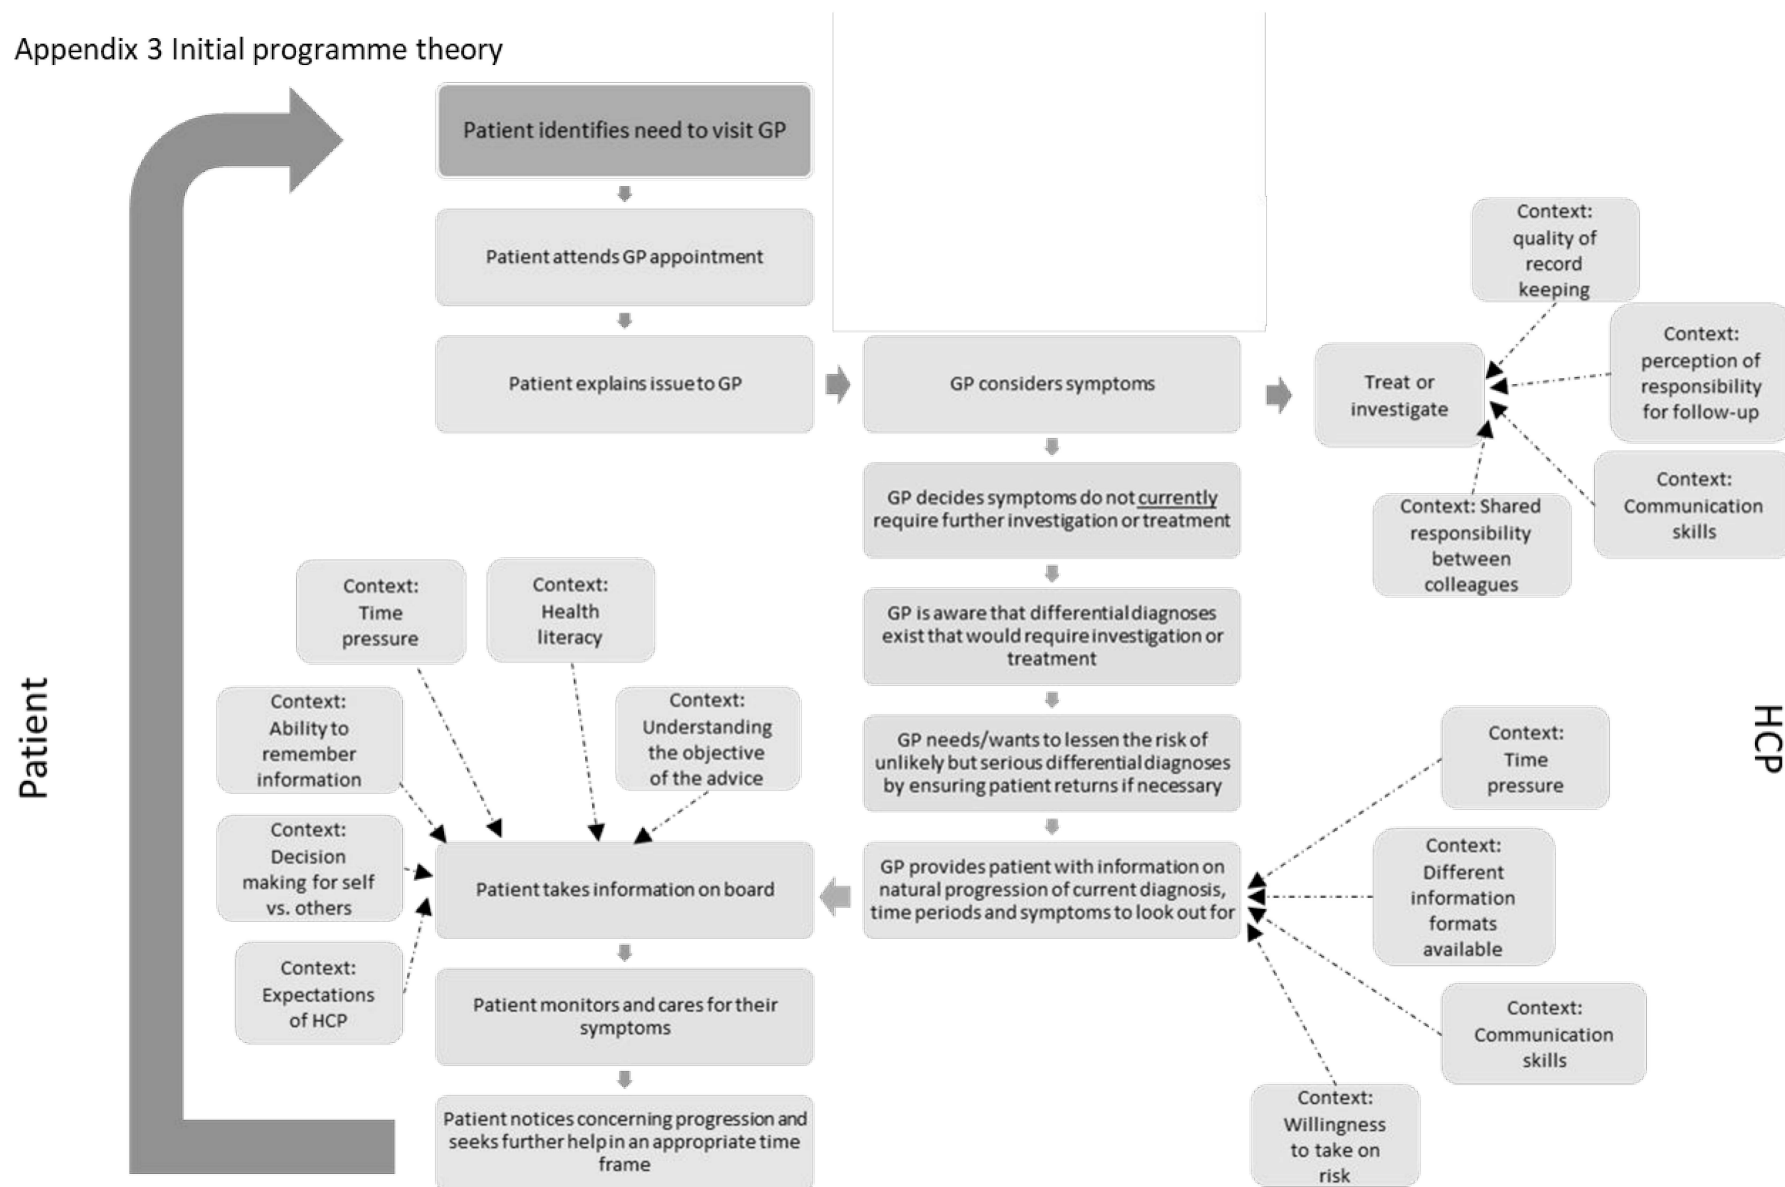

Supplement: bmjqs-2021-014529supp003.pdf [file bmjqs-2021-014529supp003.pdf]
